# Supplementary material
Source: Research Square preprint supplement (doi:10.21203/rs.3.rs-9188548/v1)
Supplement: Supplementary file 1 [file 6a3951538504ab8b85d70c79.docx]

# **Automated Longitudinal MRI Assessments of Diffuse Midline Gliomas: A Large Multi-Institutional Study**

**Supplemental Figures**

**Supplemental Figure 1.** Volume change distributions by labels derived from radiology reports (radiologist’s assessment). A total of four histograms show the distribution of net volume changes (in mm³) measured by the longitudinal model (left) and independent model (right) for session pairs classified by radiologist as "Increased" (red), "Decreased" (blue), or "Stable" (green). From top to the bottom, data points are in the whole range, ±50k, ±20k, and ±5k mm³) range.

**Supplemental Figure 2.** Subgroup analysis of the Dice scores in the internal dataset, divided by manufacturer type, magnetic field strength, and slice thickness in both longitudinal and independent models. All p-values >0.05 and non-significant.**Supplemental Figure 3.** Subgroup analysis of the Dice scores in the external (PNOC) dataset, divided by manufacturer type, magnetic field strength, and slice thickness in both longitudinal and independent models. All p-values >0.05 and non-significant, except for manufacturer subgroup analysis in the longitudinal model (p-value <0.001).
